1 **NOVEL INSIGHTS INTO SELECTION FOR ANTIBIOTIC RESISTANCE IN**  
2 **COMPLEX MICROBIAL COMMUNITIES**

3

4

5 Aimee K. Murray<sup>a</sup>#, Lihong Zhang<sup>a</sup>, Xiaole Yin<sup>b</sup>, Tong Zhang<sup>b</sup>, Angus Buckling<sup>c</sup>, Jason  
6 Snape<sup>d</sup>, William H. Gaze<sup>a</sup>#

7 <sup>a</sup>Medical School, University of Exeter, Environment & Sustainability Institute, Penryn  
8 Campus, Cornwall, TR10 9FE

9 <sup>b</sup>Department for Civil Engineering, University of Hong Kong, Pokfulam, Hong Kong

10 <sup>c</sup>College of Life and Environmental Sciences, University of Exeter, Daphne Du Maurier  
11 Building, Penryn Campus, Cornwall, TR10 9FE

12 <sup>d</sup>AstraZeneca Global Environment, Mereside, Alderley Park, Macclesfield, Cheshire, SK10 4TG

13

14 #Address correspondence to Aimee K. Murray [a.k.murray@exeter.ac.uk](mailto:a.k.murray@exeter.ac.uk) or William H. Gaze  
15 [w.h.gaze@exeter.ac.uk](mailto:w.h.gaze@exeter.ac.uk)

16

17 Abstract word count: 178

18 Text word count (excluding table footnotes and figure legends): 5,102

19 **ABSTRACT**

20 Recent research has demonstrated selection for antibiotic resistance occurs at very low  
21 antibiotic concentrations in single species experiments, but the relevance of these findings  
22 when species are embedded in complex microbial communities is unclear. We show the  
23 strength of selection for naturally occurring resistance alleles in a complex community  
24 remains constant from low sub-inhibitory to above clinically relevant concentrations.  
25 Selection increases with antibiotic concentration before reaching a plateau where selection  
26 remains constant over a two order magnitude concentration range. This is likely to be due to  
27 cross-protection of the susceptible bacteria in the community following rapid extracellular  
28 antibiotic degradation by the resistant population, shown experimentally through a  
29 combination of chemical quantification and bacterial growth experiments. Metagenome and  
30 16S rRNA analyses on sewage-derived bacterial communities evolved under cefotaxime  
31 exposure show preferential enrichment for *bla*<sub>CTX-M</sub> genes over all other beta-lactamase genes,  
32 as well as positive selection and co-selection for antibiotic resistant, opportunistic pathogens.  
33 These findings have far reaching implications for our understanding of the evolution of  
34 antibiotic resistance, by challenging the long-standing assumption that selection occurs in a  
35 dose-dependent manner.

36

37 **IMPORTANCE**

38 Antibiotic resistance is one of the greatest, global issues facing modern society. Still,  
39 comparatively little is known about selection for resistance at very low antibiotic  
40 concentrations. We show that the strength of selection for clinically important resistance  
41 genes within a complex bacterial community can remain constant across a large antibiotic

42 concentration (wide selective space). Therefore, largely understudied ecological  
43 compartments could be just as important as clinical environments for selection of antibiotic  
44 resistance.

45

## 46 **INTRODUCTION**

47 Antibiotic resistance poses a major threat to society, the sustainability of modern healthcare  
48 systems, food security and the global economy [1, 2]. Until recently, most research on  
49 evolution of resistance focused on selection at clinically relevant antibiotic concentrations, as  
50 the ‘traditional’ selective window hypothesis was universally accepted. This hypothesis states  
51 that selection for antibiotic resistance will only occur above the minimum inhibitory  
52 concentration (MIC) of susceptible bacteria and below the MIC of resistant bacteria [3]. In  
53 fact, numerous experimental studies have observed selection for resistance at sub-MIC  
54 antibiotic concentrations, at the point where the selective pressure (antibiotic) is sufficient to  
55 offset the cost of resistance [3-7]. In recent isogenic studies, a single host species with  
56 chromosomal or plasmid-borne resistance mechanisms were competed with their susceptible  
57 counterparts at varying concentrations of antibiotic to determine the minimal selective  
58 concentration (MSC) [3, 5]. The MSC is the lowest concentration of antibiotic at which  
59 resistance is positively selected, which can be significantly lower than the minimum  
60 inhibitory concentration (MIC) [3, 5]. MSCs have also been estimated using publically  
61 available, clinical breakpoint data [8] but experimental data is required to assess the validity  
62 of these predictions, especially in a community context. These findings show that the selective  
63 compartment (meaning the antibiotic gradient and spatial range along which resistant  
64 bacteria/genes could be enriched) is much larger than previously thought [9]. This in turn

65 suggests selection may be occurring in previously unconsidered selective compartments  
66 which harbour relatively low antibiotic concentrations, such as the gut microbiome, waste  
67 water and even surface waters contaminated with antibiotic residues.

68 Though these findings are significant, the use of single species means their relevance with  
69 regards to selection in complex microbial communities remains unclear. Many studies have  
70 quantified numbers and/or prevalence of resistance genes in waste water influent and effluent  
71 (including, but not limited to [10, 11]), with a recent study utilising epicPCR to identify the  
72 host background of highly abundant resistance genes [12]. However, positive selection for  
73 resistance within complex bacterial communities is a current knowledge gap [13], with  
74 experimental MSC data in complex communities severely lacking. One recent study [14]  
75 reported a biological effect at low concentrations of tetracycline in a microbial community, by  
76 quantifying tetracycline resistance gene prevalence (*tetA* and *tetG* genes normalised to 16s  
77 rRNA copy number). However, as starting gene frequencies were not measured, it is unclear if  
78 the observed effect was driven by positive selection; or reduced negative selection. In other  
79 words, without comparing the final resistance gene prevalence to the initial resistance gene  
80 prevalence, it is unknown if resistance genes actually increased over time under tetracycline  
81 exposure (i.e. were positively selected); or if resistance genes were simply lost at a slower rate  
82 compared to the no antibiotic control (i.e. were negatively selected, or showed increased  
83 persistence). Here, we aimed to quantify positive selection in a complex bacterial community  
84 by conducting evolution experiments using a waste water bacterial community inoculum to  
85 determine the MSC of cefotaxime. Co-selection for other resistance genes and effects on  
86 community structure were also determined through metagenome analyses.

87 Cefotaxime is a World Health Organisation (WHO) recognised ‘critically important’  
88 antibiotic [15], ‘essential’ for human medicine [16] that was most recently identified as a key  
89 antimicrobial stewardship target through inclusion in the WHO ‘watch list’ of essential  
90 medicines [17]. In this study, prevalence of the *bla*<sub>CTX-M</sub> gene group was determined with  
91 qPCR and selection coefficients were calculated to estimate the MSC of cefotaxime. CTX-Ms  
92 are extended spectrum beta-lactamases (ESBLs) which cleave the beta-lactam ring, effectively  
93 inactivating and degrading beta-lactam antibiotics [18]. Previous work has demonstrated beta-  
94 lactamases can inactivate extracellular beta-lactams, to the benefit of nearby susceptible  
95 bacteria [19-21]. This protective effect on susceptible bacteria has since been shown for an  
96 intracellularly expressed resistance mechanism, also degradative in nature [22].

97 Results show, for the first time, that selection for *bla*<sub>CTX-M</sub> genes occurs at very low, sub-  
98 inhibitory concentrations. We also demonstrate that selection occurs with equal potency at  
99 very low antibiotic concentrations and at concentrations greatly exceeding those used in the  
100 clinic. Therefore, antibiotic resistance is not always selected for in a dose-dependent manner.  
101 These findings illustrate the importance of studying selection for resistance within complex  
102 bacterial communities over a wide selective range, representative of different selective  
103 compartments [9].

104

## 105 **RESULTS**

106 **Cefotaxime exposure affects community structure.** Complex community (raw, untreated  
107 waste water) microcosms were spiked with a range of concentrations of cefotaxime. The  
108 exposure concentration range was selected from the EUCAST [23] defined clinical breakpoint

109 concentration (the concentration at which *Enterobacteriaceae* are considered ‘clinically’  
110 resistant) down to 0, in a two-fold dilution series including concentrations similar to those  
111 previously measured in different environments (such as hospital effluent, waste water  
112 treatment plant effluent and surface waters (low µg/L up to 150 µg/L [24-26])). Bacterial  
113 communities were transferred daily into fresh medium and fresh antibiotic for 8 days.  
114 Chemical quantification was performed at the beginning of day 0 and after 24 hours, to  
115 determine an accurate MSC (based on measured rather than nominal antibiotic concentration)  
116 and to assess the chemical stability of cefotaxime (a third generation cephalosporin of the  
117 beta-lactam class of antibiotics) in the system.

118 At the end of the experiment, three replicates from a low, medium and high antibiotic  
119 concentration were selected to undergo metagenome analyses, alongside the unexposed  
120 control to identify the key resistance genes under selection. Metagenomic DNA was  
121 sequenced with Illumina MiSeq2.

122 16S rRNA data was extracted from trimmed, quality controlled paired reads with MetaPhlan2  
123 [27]. Overall, the community comprised of predominantly Gram negative bacteria, though  
124 Gram positive bacteria were also detected (Figure S1). Between-sample variation was  
125 expected due to unavoidable heterogeneity within the complex community inoculum. Even so,  
126 there were clear differences between the control untreated bacterial community and the  
127 communities exposed to cefotaxime amongst the 25 most abundance species (Figure 1, all  
128 detected species can be seen in Figure S1). In particular, several species were eliminated by  
129 cefotaxime treatment (or reduced below the limit of detection). These included the  
130 opportunistic Gram negative pathogens *Providencia alcalifaciens*, *Aeromonas veronii*,  
131 *Morganella morganii* and *Klebsiella pneumoniae*; as well as the opportunistic Gram positive

132 pathogen *Streptococcus infantarius*. All of these were significantly associated with the no  
133 antibiotic control as determined by Linear Discriminant Analyses (LDA) effect size (LEfSe)  
134 analyses (Figure S2). Conversely, several Gram negative and Gram positive opportunistic  
135 pathogens showed greater abundance in treated communities compared to the untreated  
136 control; namely *Pseudomonas aeruginosa*, *Acinetobacter baumannii*, *Bacteroides fragilis* and  
137 *Enterococcus faecalis*; however, only *P. aeruginosa* was significantly enriched in the 2 mg/L  
138 cefotaxime treatment (LEfSe, Figure S2). Cefotaxime treatment also resulted in slightly  
139 decreased numbers of *Escherichia coli*, though this was not significant and it was still the  
140 predominant species across all treatments. In general, there was much greater variability  
141 between treatment replicates compared to the untreated control (Figure S1).

142 ***Bla*<sub>CTX-M</sub> genes are preferentially selected over all other beta-lactam resistance**  
143 **mechanisms.** Metagenomic data was further analysed with the ARGs-OAP pipeline [28],  
144 designed to thoroughly interrogate metagenomic data and identify resistance genes. Selection  
145 for beta-lactam resistance was prominent (as expected); however, co-selection for resistance  
146 to unrelated antibiotic classes was also observed: namely, co-selection for resistance to  
147 macrolides, aminoglycosides, trimethoprim, tetracyclines and sulphonamides which is likely  
148 to be due to carriage of multi-resistance plasmids (see Figure S3).

149 We delved deeper into the beta-lactam resistance genes to determine which genes, if any,  
150 were preferentially selected. We observed substantial enrichment for the beta-lactamase and  
151 extended-spectrum beta-lactamase (ESBL) genes *bla*<sub>TEM</sub>, *bla*<sub>OXA</sub> and *bla*<sub>CTX-M</sub> (Figure 2).  
152 Average increases in relative abundance from the lowest to highest concentration were 8-fold,  
153 8-fold and 70-fold, respectively. *Bla*<sub>CTX-M</sub> was preferentially selected over all other beta-  
154 lactamase encoding genes at each cefotaxime concentration.

155 **The MSC of cefotaxime is very low, but selection plateaus across a large concentration**  
156 **range.** Given the strong positive selection for *bla*<sub>CTX-M</sub>, we focused on accurate quantification  
157 of this group of genes across the entire experimental antibiotic gradient using qPCR. This  
158 follows previous work which showed qPCR is the most sensitive method for MSC  
159 determination [14]. *Bla*<sub>CTX-M</sub> gene copy number was normalised to 16S rRNA copy number,  
160 to determine a molecular ‘prevalence’ of *bla*<sub>CTX-M</sub>; this prevalence was determined for each  
161 cefotaxime concentration both at the beginning and end of the experiment. A Kruskal-Wallis  
162 test confirmed *bla*<sub>CTX-M</sub> prevalence, 16S rRNA copy number and *bla*<sub>CTX-M</sub> copy number (all  
163 n=5 each) did not differ significantly between treatments at day 0.  
164 Selection coefficients based on change in *bla*<sub>CTX-M</sub> prevalence over time were calculated and  
165 plotted against cefotaxime concentration as in previous single species assays [3, 5] (Figure 3).  
166 A positive selection coefficient value indicates positive selection is occurring, and the x-axis  
167 intercept estimates the MSC; here, 0.4µg/L (Figure S4).  
168 *Bla*<sub>CTX-M</sub> prevalence increased over time (Figure S5) and with antibiotic concentration (linear  
169 term:  $F_{1, 42} = 26.3$ ,  $P < 0.001$ ), but appeared to plateau at 500µg/L (quadratic term:  $F_{1, 42} =$   
170  $13.2$ ,  $P < 0.001$ ) so an additional experiment was performed to determine if this plateau  
171 continued at higher concentrations (Figure 3). As hypothesised, *bla*<sub>CTX-M</sub> prevalence increased  
172 when exposed to cefotaxime (linear term:  $F_{1, 36} = 9.6$ ,  $P < 0.01$ ) but remained relatively  
173 constant (quadratic term:  $F_{1, 36} = 9.4$ ,  $P < 0.01$ ) up until the two highest concentrations used  
174 in this study (Figure 3). These concentrations are over 30x and 50x times the defined clinical  
175 breakpoint cefotaxime concentration of 2 mg/L for *Enterobacteriaceae*. The rise in *bla*<sub>CTX-M</sub>  
176 prevalence at 64 mg/L was due to an increase in *bla*<sub>CTX-M</sub> gene copy number, and the decrease



177 at 128 mg/L was due to a significant decrease in *bla*<sub>CTX-M</sub> and slight reduction in 16S rRNA  
178 copy number (Figures S6 and S7).

179 **The bacterial community readily degrades cefotaxime.** We hypothesised that this plateau  
180 in selection was due to both the mechanism and sociality of the *bla*<sub>CTX-M</sub> genes: as beta-  
181 lactamase enzymes can be found both intracellularly and extracellularly [21], the plateau in  
182 *bla*<sub>CTX-M</sub> prevalence may be due to negative frequency-dependent selection [19]. In other  
183 words, the more prevalent *bla*<sub>CTX-M</sub> becomes, the lower its fitness as cefotaxime degradation  
184 is accelerated to the benefit of the entire community, including non-*bla*<sub>CTX-M</sub> bearing  
185 competitors. To investigate if cefotaxime was degraded by the community, chemical  
186 quantification of cefotaxime in the presence of the community was performed. Incubating the  
187 microcosms for 24 hours resulted in complete degradation of cefotaxime, at all but the highest  
188 concentration (Table S1). All measured concentrations were lower than expected, and the  
189 lowest concentration (15.625 µg/L) was below the limit of detection at the beginning of the  
190 assay. Therefore the MSC (0.4 µg/L) is estimated based on nominal concentrations, but in  
191 reality is likely to be lower still. As cefotaxime is known to be relatively unstable [29] an  
192 overnight degradation experiment was conducted to determine the amount of biotic and  
193 abiotic degradation occurring in the experimental system. A sterile microcosm and another  
194 inoculated with the complex community was incubated and destructively sampled at 0 hours,  
195 6 hours and then every 3 hours for 24 hours. In sterile culture cefotaxime had only partially  
196 degraded over 24 hours; whereas in the presence of the community, cefotaxime was  
197 undetectable following 12 hours incubation (Figure 4A and 4B). This increase in degradation  
198 rate coincided with the beginning of the exponential growth phase of the community (Figure  
199 S8).

200 **Extracellular beta-lactamases ‘protect’ susceptible bacteria at cefotaxime concentrations**  
201 **well above MIC.** To confirm this degradation was biotic and by extracellular beta-lactamases,  
202 an additional experiment was performed whereby a susceptible *E. coli* strain (J53) was  
203 cultured in the presence of supernatant derived from an overnight culture of an *E. coli* strain  
204 bearing *bla*<sub>CTX-M-15</sub>, *bla*<sub>TEM-1</sub> and *bla*<sub>OXA-1</sub> on a fully sequenced resistance plasmid [30] (strain  
205 NCTC 13451, available from Public Health England). Addition of the supernatant from the  
206 resistant strain allowed growth of the susceptible strain at the clinical breakpoint  
207 concentration [23], which was over 10x the MIC of the susceptible strain (Figure 5).

208

## 209 **DISCUSSION**

210 Here, we quantified positive selection for antibiotic (cefotaxime) resistance in a waste water  
211 derived complex bacterial community, by quantifying changes in resistance gene prevalence  
212 over time. We show clinically important [31] resistance genes (*bla*<sub>CTX-M</sub>) were positively  
213 selected at very low, environmentally-relevant concentrations likely due a combination of  
214 clonal expansion of hosts carrying *bla*<sub>CTX-M</sub> and horizontal gene transfer of plasmids bearing  
215 *bla*<sub>CTX-M</sub>. Antibiotic quantification has been identified as an overlooked aspect of MSC  
216 determination [13]. We quantified antibiotic concentrations when determining minimal  
217 selective concentrations and found cefotaxime to be rapidly degraded by the community,  
218 suggesting the estimated MSC of 0.4 µg/L to be an underestimate. Even so, the cefotaxime  
219 MSC determined in this study was very similar to several measured environmental  
220 concentrations [25, 32], suggesting selection could occur in certain environments such as  
221 hospital effluent and waste water influent. Responses to selection in such environments may  
222 be reduced, as unenriched bacterial communities e.g. in sewage may be impacted by high cell

223 numbers and associated reduction in resource availability. However it is also possible that  
224 sustained exposure over long time periods would produce the same response.

225 In addition, we observed a plateau in the strength of selection across a very large antibiotic  
226 concentration range. This novel finding contrasts with previous work which has shown  
227 resistance to increase monotonically with antibiotic concentration [3, 5, 14]. A crucial  
228 implication of this finding is that selection for clinically important resistance mechanisms,  
229 such as *bla*<sub>CTX-M</sub>, may occur to a similar extent at sub-inhibitory concentrations as at high,  
230 clinical concentrations. The observed plateau in resistance selection has clinical relevance,  
231 when considering the antibiotic concentration gradients which inevitably form in different  
232 body compartments during chemotherapy [33]. These may also provide greater potential for  
233 selection for antibiotic resistance *in vivo* than previously considered. Potential overtreatment  
234 with unnecessarily long antibiotic courses [34] may compound this effect. Future research  
235 should address this finding and its relevance to environmental protection, effective antibiotic  
236 treatment and antimicrobial stewardship.

237 The observed plateau in selection for resistance is likely due to the cross-protective effect  
238 conferred by the resistant fraction on the susceptible fraction of bacteria in the population.  
239 Three lines of evidence strongly support this: 1) the degradative effect of the community,  
240 whereby within 24 hours all cefotaxime is degraded below the limit of chemical  
241 quantification, including the very highest, clinical breakpoint concentration. 2) metagenome  
242 analyses of 3 replicates at 4 antibiotic concentrations, which showed the main mechanism of  
243 resistance to the treatment antibiotic was degradative in nature, and could therefore provide a  
244 benefit to susceptible competitors within the community. 3) The single species *E. coli*  
245 experiment, which used supernatant from a resistant strain bearing a multi-resistance plasmid

246 with the plasmid-free strain to show the potential extent of this community-wide benefit. The  
247 level of protection conferred by extracellular beta-lactamases in the supernatant of the  
248 resistant strain culture allowed growth of the susceptible strain well above its own MIC, at the  
249 clinical breakpoint concentration. Extrapolating this finding to the community, we  
250 hypothesise that within each 24 hour time period, CTX-M producers (and possibly other  
251 degraders) are selected for by cefotaxime, and are then outcompeted by susceptible bacteria  
252 following antibiotic degradation. This means resistant genotypes are likely to persist at even  
253 very low antibiotic concentrations, as they provide a benefit to the whole community; this  
254 effect has been modelled previously [19].

255 Selection for *bla*<sub>CTX-M</sub> genes is likely due a combination of clonal expansion of hosts carrying  
256 *bla*<sub>CTX-M</sub> and horizontal gene transfer of plasmids bearing *bla*-<sub>CTX-M</sub>. Our results are consistent  
257 with epidemiological data on beta-lactam resistance genes [35, 36], which document the rapid  
258 spread of *bla*<sub>CTX-M</sub> genes worldwide to a ‘pandemic’ status. In this study, *bla*<sub>CTX-M</sub> genes were  
259 under stronger selection than a large diversity of other resistance genes, possibly due to lower  
260 fitness cost (either metabolic or due to genetic context), and/or due to more efficient  
261 degradation and a potential wider degradative capacity. For example, previous research found  
262 the MICs of *bla*<sub>CTX-M</sub> positive bacteria isolated from river sediment downstream of a waste  
263 water treatment plant were in excess of 2048 µg/ml [37]. Additionally, many TEM and OXA  
264 beta-lactamases do not have the extended-spectrum degradative capability of CTX-M ESBLs  
265 [35, 36]. We suggest the ability of *bla*<sub>CTX-M</sub> genes to outcompete other beta-lactamase genes at  
266 all studied concentrations may also have contributed to the ‘pandemic’ spread of *bla*<sub>CTX-M</sub>  
267 genes worldwide [35] and the replacement of other beta-lactamase variants [36].

268 The metagenome analyses showed *ampC* genes were detected but not enriched by cefotaxime  
269 exposure. Overexpression of chromosomal *ampC* genes can increase levels of resistance to  
270 many antibiotics, including cefotaxime but these genes were very rare within metagenomes  
271 and only confer low level resistance up to 8 mg/L [38] suggesting they do not play a  
272 significant role at the community level in this study [39]. The metagenome analyses also  
273 showed cefotaxime can also co-select for resistance to a range of antibiotic classes, even at  
274 sub-inhibitory cefotaxime concentrations. Co-occurrence of *bla*<sub>CTX-M</sub> genes and  
275 aminoglycoside resistance has been reported previously and is confirmed here [36]. High  
276 levels of co-selection also indicates presence of multi-drug resistant plasmids, via co-  
277 resistance (i.e. co-localisation of multiple genes, of which only one needs to be under positive  
278 selection) [40].

279 The bacterial community analyses showed that cefotaxime had significant effects on  
280 community structure, even at sub-inhibitory concentrations through elimination of several  
281 species as determined by LEfSe. The bacterial communities in all treatments comprised  
282 mainly of Gram negative bacterial families, with *E. coli* being the most abundant species in all  
283 treatments. In waste water, with a lower temperature and different nutritional composition,  
284 inter-species competition with other taxa could result in reduced *E. coli* abundance which may  
285 be favoured by the media and temperature used in this study. However, *E. coli* are known to  
286 survive waste water treatment and are used as faecal indicator organisms to assess water  
287 quality [41]. Therefore, in waste water, *E. coli* may still possess a competitive advantage.  
288 There was much greater variability between replicates (for all species other than *E. coli*)  
289 within exposed communities, indicative of potential founder effects on evolution within  
290 individual microcosms, again supporting the hypothesis selection was acting at these

291 concentrations. Worryingly, cefotaxime exposure enriched for well-known opportunistic  
292 Gram negative pathogens including *P. aeruginosa*, which readily infects  
293 immunocompromised individuals such as cystic fibrosis patients; and *A. baumannii*, which is  
294 most commonly associated with hospital-acquired infections [42]. Enrichment these  
295 opportunistic pathogens and human and gut commensals such as *B. fragilis* and *E. faecalis*  
296 under cefotaxime exposure may be due to intrinsic resistance which is likely to result in  
297 enrichment within communities including susceptible strains.

298 In summary, our findings develop understanding of selection for antibiotic resistance by  
299 showing that the strength of selection for clinically important resistance genes in a community  
300 context can be equal across a very large antibiotic concentration gradient; in other words, we  
301 show the strength of selection within a given selective space may be constant. Therefore,  
302 selection pressure below the MIC of susceptible bacteria may be as strong as selection  
303 between the MICs of susceptible and resistant bacteria (traditional selective window). We  
304 hypothesise that in our study, this observation is due to the community-wide benefit provided  
305 by resistant bacteria harbouring degradative resistance mechanisms. Marked increases in  
306 common Gram negative, opportunistic pathogens and co-selection for resistance to other  
307 antibiotic classes raises concerns about selection and co-selection for clinically relevant genes  
308 (such as *bla*<sub>CTX-M</sub>) in pathogenic hosts occurring in a wide range of ecological compartments.

309

## 310 **MATERIALS AND METHODS**

311 **Complex community collection, storage and preparation.** Domestic sewage influent from a  
312 waste water treatment plant serving a small town was collected in October 2015. The treatment

313 plant serves a population of 43 000. Single use aliquots were mixed in a 1:1 ratio with 20 %  
314 glycerol, vortexed and stored at -80 °C. Before use, samples were spun down at 21,100 g for 10  
315 minutes, the supernatant removed, and the pellet resuspended twice in equal volume of 0.85%  
316 NaCl to prevent nutrient/chemical carry over.

317 A pilot experiment (data not shown) was conducted to determine the appropriate density of the  
318 complex community inoculum by comparing growth over 24hours of different dilutions of  
319 inoculum at a range of antibiotic concentrations in a 96 well plate. Following results from the  
320 pilot experiment, the 10 % volume/volume waste water inoculum was used for all further  
321 experiments using the complex community on the basis it produced the tightest replicates at all  
322 the time points and the most reliable growth phases over 24 hours.

323

324 **Selection experiments.** Iso-sensitest broth (Sigma) was inoculated with 10 % volume/volume of  
325 untreated waste water. This was separated into 30 ml aliquots and appropriate amounts of  
326 cefotaxime stock solution were added. Cefotaxime (Molekular) stocks were prepared in  
327 autoclaved and filtered (0.22 µM) deionised water.

328 These 30ml aliquots were further separated into 5ml aliquots, with 5 replicates for each of the  
329 cefotaxime assay concentrations: 2 mg/L, 1 mg/L and 500, 250, 125, 62.5, 31.25, 15.625 and 0  
330 µg/L for the first experiment; and at 128, 64 , 32 , 16 , 8 , 4 , 2 and 0 mg/L for the second  
331 experiment.

332 All replicates were immediately sampled for the day 0 sampling time point: 2 x 1ml of each  
333 replicate for each treatment was spun down at 21 100 xg for 3 minutes, the supernatant removed  
334 and pellet resuspended in 1000 µl 20% glycerol followed by storage at -80 °C. All other samples

335 for DNA extraction were taken following each overnight incubation at 37 °C, 180 rpm shaking,  
336 as above.

337 After each incubation, 50 µl of each microcosm was inoculated into 5ml fresh medium with fresh  
338 antibiotic, and samples taken as above for a total of 8 days. Remaining cell suspensions were  
339 spun down and stored as above at the end of each experiment.

340

341 **Metagenome analyses.** Three replicates were chosen at random from the no antibiotic, 125  
342 µg/L, 500 µg/L and 2 mg/L treatment to undergo shotgun metagenomic sequencing on the  
343 MiSeq2 v2 platform at University of Exeter Sequencing Service (ESS).

344 DNA was extracted from 1 ml of frozen overnight culture using the MoBio extraction kit  
345 according to manufacturer's instructions. DNA was cleaned and concentrated using Ampure™  
346 beads. Firstly, 2 µl of 20 mg/ml RNase A (Qiagen) was added to 50 µl DNA and incubated for  
347 10 minutes at 37 °C. 50 µl of Ampure™ beads were mixed with the DNA/RNase solution and  
348 mixed gently by pipetting and incubated at room temperature for 5 – 10 minutes. Following  
349 pulse centrifugation to collect droplets, tubes were placed on a magnetic stand and left until all  
350 beads had precipitated to the side of the tube. Supernatant was removed and beads were washed  
351 two times with 300 µl freshly prepared 80 % ethanol. Beads were air dried briefly (1 – 2  
352 minutes), resuspended in 10µl 10mM Tris-HCL and then incubated for another 10 minutes at 50  
353 °C. Following pulse centrifugation and bead precipitation, DNA was transferred into a fresh tube  
354 and stored at -20 °C until library preparation and sequencing.

355 The 12 Nextera Library preparations, quality control, sequencing and primary sequencing  
356 analysis (including trimming reads of the barcodes) was performed by ESS. Data was then run



357 through the “online analysis pipeline for antibiotic resistance genes detection from metagenomic  
358 data using an integrated structured antibiotic resistance gene database”, the ARGs-OAP [28].  
359 This provides the abundance of different resistance gene classes and subtypes within these  
360 groups normalised by parts per million, 16S rRNA copy number, and cell number. For all  
361 subsequent analysis, data normalised by 16S rRNA copy number was used to be in accordance  
362 with the qPCR data generated. Heatmaps for resistance gene abundance were generated using  
363 pandas [43], matplotlib [44] and seaborn [45] Python packages for resistance gene class and  
364 beta-lactam resistance gene subtype, for averages of these three replicates.

365 16S rRNA sequences were extracted from the Illumina sequencing data as follows: first, forward  
366 and reverse reads were adaptor trimmed using Skewer [46] in paired end mode. Fastqc [47] and  
367 Multiqc [48] verified successful adaptor removal and that sequences were of acceptable quality  
368 before paired end reads were combined with FLASH version 2 [49] with the maximum overlap  
369 set to 300. 16S rRNA sequences were extracted and assigned to bacterial species using  
370 Metaphlan2 [27]. The resulting heatmap of species relative abundance was generated using  
371 HClust2 using Bray Curtis distance measurements between samples and features (species) [50];  
372 and overall species abundance across treatments was visualised with GraPhlan [51]. Linear  
373 Discriminant Analyses (LDA) effect size (LEfSe) analyses was performed and visualised with  
374 LEfSe [52] to identify which species, if any, were enriched by a particular cefotaxime treatment.

375

376 **qPCR analyses.** Frozen samples/were thawed and DNA extracted using the MBio UltraClean  
377 DNA extraction Kit according to instructions. DNA was diluted 5 – 10x before use.

378 The qPCR conditions were optimised using primers from previous studies [53, 54]: 10 µl  
379 Brilliant qPCR SYBR Green master mix, 2 µl primer pair (5 µM each of forward and reverse  
380 primers for 16S rRNA, and 9 µM each of forward and reverse CTX-M primers), 0.2 µl BSA (20  
381 mg/ml), 0.4 µl ROX reference dye (20 µM), 5 µl diluted DNA template and filtered, sterilised  
382 water to a total volume of 20 µl. The qPCR programme for all reactions was 95 °C for 3 minutes,  
383 followed by 40 cycles of 95 °C for 10 seconds and 60 °C for 30 seconds. *Bla*<sub>CTX-M</sub> copy number  
384 was divided by 16S rRNA copy number to determine *bla*<sub>CTX-M</sub> gene/16S rRNA, a proxy for *bla*-  
385 <sub>CTX-M</sub> prevalence.

386 gBlock synthetic genes (IDTDNA - see Table 1) were used as qPCR standards; these were  
387 resuspended in TE buffer according to the manufacturer's instructions and were stored at -80 °C.  
388 Standards were 10 x serially diluted in TE buffer and stored at -20 °C before use. Every PCR  
389 plate was always run with 5 serial dilutions of standards in duplicate (and a duplicate negative  
390 control). Provided the efficiency for the reaction was between 90 % and 110 %, the average CT's  
391 for the duplicate technical replicates for each sample was used to calculate the copy number  
392 based on a 'gold standard' standard series, where the DNA concentration had been quantified by  
393 QuBit and the copy number per µl quantified immediately prior to cycling.

394

395 **Data analyses.** All statistics were performed in R Studio [55]. Selection coefficients were used  
396 to determine MSC, with the following equation, as previously[3]:  $[\ln(R(t)/R(0))]/[t]$ , where R =  
397 resistance prevalence, t = time in days and R(0) = resistance prevalence at time zero. The MSC is  
398 estimated by the line of best fit X-axis intersect. Figures were generated with various python  
399 packages [43-45].

400

401 **Chemical extraction/analyses.** Complex community microcosms were sampled at the Day 0  
402 time point and after the first 24 hours. Antibiotic stocks were also quantified.

403 The extraction procedure was as follows: 400  $\mu\text{l}$  of culture was mixed with 400  $\mu\text{l}$   
404 HiPerChromosolv Acetonitrile in a 2 ml 96 well plate, and spun at 3500 rpm for 30 minutes. 100  
405  $\mu\text{l}$  of this supernatant was then mixed with 900  $\mu\text{l}$  of 1:4 Acetonitrile to HPLC-grade water in a  
406 fresh plate, and stored in the fridge. Antibiotic stocks were diluted to a final concentration of 100  
407 ng/L in 1:4 Acetonitrile. Extractions were kept at 4 °C until processing.

408 Each concentration from the evolution experiment had a minimum of two chemical replicates  
409 from at least two of the biological replicates. Stocks were single replicate only.

410 Chemical quantification was performed at the University of Exeter Streatham Campus by  
411 Maciek Trnzadel and Malcolm Hetherdige, co-funded by AstraZeneca Global SHE and the  
412 University of Exeter.

413

414 **Antibiotic degradation experiment.** Washed, untreated waste water was diluted in 25ml Iso-  
415 sensitest broth aliquots spiked with cefotaxime concentrations of 0, 15.625, 31.25, 62.5, 125,  
416 250, 500  $\mu\text{g/L}$  or 2  $\text{mg/L}$ . A sterile control at the same concentrations was also prepared. These  
417 were incubated at 37 °C, 180 rpm shaking in between sampling. Chemical extractions (see  
418 below) and destructive sampling for OD readings were performed at time 0, then every 3 hours  
419 for 24 hours. OD measurements were carried out in a spectrophotometer (Jenway, UK) at the  
420 same time points at 600 nm. Any OD readings with a value greater than 1 were diluted 10 x in  
421 Iso-sensitest broth and then re-measured.

422

423 **Supernatant experiment.** *E.coli* strains J53 and NCTC 13451 were grown overnight at 37 °C,  
424 shaking at 180 rpm in Iso-sensitest broth (supplemented with 2 mg/L cefotaxime for NCTC  
425 13451). This concentration was chosen on the basis it was greater than the J53 MIC (> 250 µg/L  
426 and < 500 µg/L, determined by microdilution assay [56]), that it would be fully degraded in a  
427 beta-lactamase producing community (according to the overnight degradation experiment); and  
428 because it is the clinical breakpoint concentration for *Enterobacteriaceae* [23]. The supernatants  
429 from both overnight cultures were spun down at 21 000 *x g* for 2 minutes twice, and then filtered  
430 through a 0.22 µm filter. J53 was inoculated at a starting optical density (600nm) of 0.01 into  
431 fresh Iso-sensitest broth amended with 2 mg/L and J53 or NCTC 13451 supernatant (12.5%  
432 volume/volume). Controls included a blank control (to check general aseptic technique), broth  
433 with each supernatant (to verify the supernatant was sterile); and J53 in broth both with and  
434 without antibiotic (to deduce effects of nutrient dilution).

435

#### 436 **ACKNOWLEDGEMENTS**

437 Aimee Murray was supported by a BBSRC/AZ CASE Studentship, BB/L502509/1. Lihong  
438 Zhang was supported Natural Environment Research Council grant NE/M01133X/1. Chemical  
439 extraction and quantification protocols, and chemical quantification were performed by Maciej  
440 Trznadel and Malcolm Hetheridge, University of Exeter and were funded by AstraZeneca,

441

442 **REFERENCES**

- 443 1. O'Neill, *O'Neill Report Wellcome Trust. Review on Antimicrobial Resistance.*  
444 *Antimicrobial Resistance: Tackling a crisis for the health and wealth of nations.*  
445 2014.
- 446 2. O'Neill, *Review on Antimicrobial Resistance: Tackling Drug-Resistant Infections*  
447 *Globally. Antimicrobials in agriculture and the environment: reducing*  
448 *unnecessary use and waste.*, H. Government, Editor. 2015.
- 449 3. Gullberg, E., et al., *Selection of Resistant Bacteria at Very Low Antibiotic*  
450 *Concentrations.* Plos Pathogens, 2011. 7(7).
- 451 4. Andersson, D.I. and D. Hughes, *Evolution of antibiotic resistance at non-lethal*  
452 *drug concentrations.* Drug Resistance Updates, 2012. 15(3): p. 162-172.
- 453 5. Gullberg, E., et al., *Selection of a multidrug resistance plasmid by sublethal levels*  
454 *of antibiotics and heavy metals.* MBio, 2014. 5.
- 455 6. Negri, M.C., et al., *Concentration-dependent selection of small phenotypic*  
456 *differences in TEM beta-lactamase-mediated antibiotic resistance.* Antimicrobial  
457 Agents and Chemotherapy, 2000. 44(9): p. 2485-2491.
- 458 7. Negri, M.-C., et al., *Very Low Cefotaxime Concentrations Select for Hypermutable*  
459 *Streptococcus pneumoniae Populations.* Antimicrobial Agents and Chemotherapy,  
460 2002. 46(2): p. 528-530.
- 461 8. Bengtsson-Palme, J. and D.G. Larsson, *Concentrations of antibiotics predicted to*  
462 *select for resistant bacteria: Proposed limits for environmental regulation.*  
463 Environ Int, 2016. 86: p. 140-9.

- 464 9. Baquero, F. and T.M. Coque, *Widening the spaces of selection: evolution along*  
465 *sublethal antimicrobial gradients*. MBio, 2014. **5**(6): p. e02270.
- 466 10. Volkmann, H., et al., *Detection of clinically relevant antibiotic-resistance genes in*  
467 *municipal wastewater using real-time PCR (TaqMan)*. Journal of Microbiological  
468 Methods, 2004. **56**(2): p. 277-286.
- 469 11. Schwartz, T., et al., *Detection of antibiotic-resistant bacteria and their resistance*  
470 *genes in wastewater, surface water, and drinking water biofilms*. Fems  
471 Microbiology Ecology, 2003. **43**(3): p. 325-335.
- 472 12. Hultman, J., et al., *Host range of antibiotic resistance genes in wastewater*  
473 *treatment plant influent and effluent*. FEMS Microbiol Ecol, 2018. **94**(4).
- 474 13. Karkman, A., et al., *Antibiotic-Resistance Genes in Waste Water*. Trends in  
475 Microbiology, 2018. **26**(3): p. 220-228.
- 476 14. Lundstrom, S.V., et al., *Minimal selective concentrations of tetracycline in*  
477 *complex aquatic bacterial biofilms*. Sci Total Environ, 2016. **553**: p. 587-595.
- 478 15. WHO, *Critically Important Antimicrobials for Human Medicine*. 2011, Advisory  
479 Group on Integrated Surveillance of Antimicrobial Resistance (AGISAR).
- 480 16. WHO, *19th WHO Model List of Essential Medicines*. 2015.
- 481 17. WHO, *WHO Model List of sstantial Medicines*. 2017.
- 482 18. Livermore, D.M., *beta-Lactamases in laboratory and clinical resistance*. Clinical  
483 Microbiology Reviews, 1995. **8**(4): p. 557-584.

- 484 19. Dugatkin, L.A., M. Perlin, and R. Atlas, *The Evolution of Group-beneficial Traits*  
485 *in the Absence of Between-group Selection*. Journal of Theoretical Biology, 2003.  
486 **220**(1): p. 67-74.
- 487 20. Medaney, F., et al., *Live to cheat another day: bacterial dormancy facilitates the*  
488 *social exploitation of beta-lactamases*. ISME J, 2015.
- 489 21. Yurtsev, E.A., et al., *Bacterial cheating drives the population dynamics of*  
490 *cooperative antibiotic resistance plasmids*. Molecular Systems Biology, 2013.  
491 **9**(1).
- 492 22. Bottery, M.J., A.J. Wood, and M.A. Brockhurst, *Selective Conditions for a*  
493 *Multidrug Resistance Plasmid Depend on the Sociality of Antibiotic Resistance*.  
494 Antimicrob Agents Chemother, 2016. **60**(4): p. 2524-7.
- 495 23. EUCAST, *The European Committee on Antimicrobial Susceptibility Testing.*  
496 *Breakpoint tables for interpretation of MICs and zone diameters*. . 2014. **Version**  
497 **4.0**.
- 498 24. Gomez, M.J., et al., *Solid-phase extraction followed by liquid chromatography-*  
499 *time-of-flight-mass spectrometry to evaluate pharmaceuticals in effluents. A pilot*  
500 *monitoring study*. J Environ Monit, 2007. **9**(7): p. 718-29.
- 501 25. UmweltBundesamt, *Pharmaceuticals in the environment*, UBA, Editor. 2016.
- 502 26. Homem, V. and L. Santos, *Degradation and removal methods of antibiotics from*  
503 *aqueous matrices - A review*. Journal of Environmental Management, 2011.  
504 **92**(10): p. 2304-2347.

- 505 27. Truong, D.T., et al., *MetaPhlan2 for enhanced metagenomic taxonomic profiling*.  
506 Nat Methods, 2015. **12**(10): p. 902-3.
- 507 28. Yang, Y., et al., *ARGs-OAP: online analysis pipeline for antibiotic resistance*  
508 *genes detection from metagenomic data using an integrated structured ARG-*  
509 *database*. Bioinformatics, 2016. **32**(15): p. 2346-51.
- 510 29. Das Gupta, V., *Stability of cefotaxime sodium as determined by high-performance*  
511 *liquid chromatography*. J Pharm Sci, 1984. **73**(4): p. 565-7.
- 512 30. Woodford, N., et al., *Complete Nucleotide Sequences of Plasmids pEK204,*  
513 *pEK499, and pEK516, Encoding CTX-M Enzymes in Three Major Escherichia*  
514 *coli Lineages from the United Kingdom, All Belonging to the International*  
515 *O25:H4-ST131 Clone*. Antimicrobial Agents and Chemotherapy, 2009. **53**(10): p.  
516 4472-4482.
- 517 31. CDC, *Antibiotic resistance threats in the United States, 2013*. 2013, Centre for  
518 Disease Control and Prevention.
- 519 32. Gulkowska, A., et al., *Removal of antibiotics from wastewater by sewage*  
520 *treatment facilities in Hong Kong and Shenzhen, China*. Water Research, 2008.  
521 **42**(1-2): p. 395-403.
- 522 33. Pena-Miller, R., et al., *When the most potent combination of antibiotics selects for*  
523 *the greatest bacterial load: the smile-frown transition*. PLoS Biol, 2013. **11**(4): p.  
524 e1001540.
- 525 34. Llewelyn, M.J., et al., *The antibiotic course has had its day*. BMJ, 2017. **358**.



- 526 35. Canton, R. and T.M. Coque, *The CTX-M beta-lactamase pandemic*. Current  
527 Opinion in Microbiology, 2006. **9**(5): p. 466-475.
- 528 36. Cantón, R., J.M. González-Alba, and J.C. Galán, *CTX-M Enzymes: Origin and*  
529 *Diffusion*. Frontiers in Microbiology, 2012. **3**: p. 110.
- 530 37. Amos, G.C., et al., *Waste water effluent contributes to the dissemination of CTX-*  
531 *M-15 in the natural environment*. J Antimicrob Chemother, 2014.
- 532 38. Peter-Getzlaff, S., et al., *Detection of AmpC Beta-Lactamase in Escherichia coli:*  
533 *Comparison of Three Phenotypic Confirmation Assays and Genetic Analysis*.  
534 Journal of Clinical Microbiology, 2011. **49**(8): p. 2924-2932.
- 535 39. Jacoby, G.A., *AmpC beta-lactamases*. Clin Microbiol Rev, 2009. **22**(1): p. 161-82,  
536 Table of Contents.
- 537 40. Baker-Austin, C., et al., *Co-selection of antibiotic and metal resistance*. Trends in  
538 Microbiology, 2006. **14**(4): p. 176-182.
- 539 41. Ashbolt, N.J., W.O.K. Grabow, and M. Snozzi, *Indicators of microbial water*  
540 *quality*, in *Water Quality: Guidelines, Standards and Health*, L. Fewtrell and J.  
541 Bartram, Editors. 2001, WHO: London.
- 542 42. Howard, A., et al., *Acinetobacter baumannii: An emerging opportunistic*  
543 *pathogen*. Virulence, 2012. **3**(3): p. 243-250.
- 544 43. McKinney, W., *Data structures for Statistical Computing in Python*. Proceedings  
545 of the 9th Python in Science Conference. 2010.
- 546 44. Hunter, J.D., *Matplotlib: A 2D graphics environment*. Computing In Science &  
547 Engineering, 2007. **9**(3): p. 90-95.

- 548 45. Waskom, M., *seaborn: v0.7.1 (June 2016)*. 2016.
- 549 46. Jiang, H., et al., *Skewer: a fast and accurate adapter trimmer for next-generation*  
550 *sequencing paired-end reads*. BMC Bioinformatics, 2014. **15**(1): p. 182.
- 551 47. Andrews, S., *FastQC A Quality Control tool for High Throughput Sequence Data*.
- 552 48. Ewels, P., et al., *MultiQC: summarize analysis results for multiple tools and*  
553 *samples in a single report*. Bioinformatics, 2016. **32**(19): p. 3047-3048.
- 554 49. Magoc, T. and S.L. Salzberg, *FLASH: fast length adjustment of short reads to*  
555 *improve genome assemblies*. Bioinformatics, 2011. **27**(21): p. 2957-63.
- 556 50. Segata, N., *HClust2*.
- 557 51. Asnicar, F., et al., *Compact graphical representation of phylogenetic data and*  
558 *metadata with GraPhlAn*. PeerJ, 2015. **3**: p. e1029.
- 559 52. Segata, N., et al., *Metagenomic biomarker discovery and explanation*. Genome  
560 Biol, 2011. **12**(6): p. R60.
- 561 53. Birkett, C.I., et al., *Real-time TaqMan PCR for rapid detection and typing of genes*  
562 *encoding CTX-M extended-spectrum  $\beta$ -lactamases*. Journal of Medical  
563 Microbiology, 2007. **56**(1): p. 52-55.
- 564 54. Czekalski, N., E. Gascon Diez, and H. Burgmann, *Wastewater as a point source of*  
565 *antibiotic-resistance genes in the sediment of a freshwater lake*. ISME J, 2014.
- 566 55. RStudio, *RStudio: Integrated Development for R*. RStudio, Inc., Boston, MA. 2015.
- 567 56. Andrews, J., *Determination of minimum inhibitory concentrations*. Journal of  
568 Antimicrobial Chemotherapy, 2001. **48**(S1): p. 15-16.

569

570 **TABLES**

571 Table 1. List of synthetic gene blocks used in the study, their DNA sequence, size in bp, and  
 572 accession numbers used to for design.

| Gene  | Sequence                                                                                                                                                                                                                                                                                                                      | Size (bp) | Accession numbers          |
|-------|-------------------------------------------------------------------------------------------------------------------------------------------------------------------------------------------------------------------------------------------------------------------------------------------------------------------------------|-----------|----------------------------|
| 16S   | ACGGTGAATACGTTCCCGGGCCTTGTA<br>CACACCGCCCGTCACACCATGGGAGTG<br>GGTTGCAAAGAAGTAGGTAGCTTAAC<br>CTTCGGGAGGGCGCTTACCACTTTGTG<br>ATTCATGACTGGGGTGAAGTCGTAACA<br>AGGTAACCG                                                                                                                                                           | 144       | <a href="#">CP018770.2</a> |
| CTX-M | GATGTGCAGCACCAGTAAAGTGATGGC<br>CGCGGCCGCGGTGCTGAAGAAAAGTGA<br>AAGCGAACCGAATCTGTAAATCAGCGA<br>GTTGAGATCAAAAAATCTGACCTTGTTAA<br>CTATAATCCGATTGCGGAAAAGCACGTC<br>AATGGGACGATGTCACCTGGCTGAGCTTA<br>GCGCGGCCGCGCTACAGTACAGCGATAA<br>CGTGGCGATGAATAAGCTGATTGCTCACG<br>TTGGCGGCCCGGCTAGCGTCACCGCGTTC<br>GCCCGACAGCTGGGAGACGAAACGTTCC | 338       | <a href="#">KX452391.1</a> |

|  |                               |  |  |
|--|-------------------------------|--|--|
|  | GTCTCGACCGTACCGAGCCGACGTTAAAC |  |  |
|  | ACCGCCATTCCGGGCGATCCGCGTGATA  |  |  |

573

574 **FIGURE LEGENDS**

575 Figure 1. Heatmap showing the relative abundance of detected species using Bray Curtis distance  
576 measurements for treatment (x axis) and species (y axis) for each cefotaxime treatment. ‘C0’,  
577 ‘C4’, ‘C6’ and ‘C8’ correspond to 0, 125, 500 and 2000 µg/L cefotaxime respectively. The  
578 number after the concentration denotes the biological replicate number (1 – 5), chosen randomly  
579 for sequencing at day 8 of the experiment.

580

581 Figure 2. Heatmap showing average (n=3) detected beta-lactam resistance gene subtype relative  
582 abundance (resistance gene number normalised with 16S rRNA copy number), following 8 days  
583 culture with cefotaxime. Only genes detected with the ARGs-OAP pipeline are shown.

584

585 Figure 3. Selection coefficients (n=5) for each cefotaxime concentration, which equal the natural  
586 log of resistance gene prevalence ( $\text{bla}_{\text{CTX-M}}$  gene/16S rRNA copy number) at day 0 and day 8. ●  
587 = selection coefficients from low concentration experiment and ■ = from high concentration  
588 experiment. Selection coefficients > 0 indicate positive selection.

589

590 Figure 4. Single biological replicate, duplicate chemical replicate chemical quantification of  
591 cefotaxime (‘Measured cefotaxime concentration ug/L’) at 0 and 6 hours, then every 3 hours for

592 24 hours at different starting cefotaxime concentrations ( $\mu\text{g/L}$ ) in the presence of the complex  
593 bacterial community (A) and in sterile culture (B).

594

595 Figure 5. Average ( $n=4$ ) optical density (600nm) over time of susceptible *E. coli* strain J53  
596 grown in 2000  $\mu\text{g/L}$  cefotaxime (clinical breakpoint concentration for *Enterobacteriaceae*) with  
597 beta-lactamase containing supernatant (NCTC strain 13451) or beta-lactamase free supernatant  
598 (strain J53).

599

## 600 SUPPLEMENTARY LEGENDS

601 Figure S1. Heatmap showing relative abundance of all detected species using Bray Curtis  
602 distance measurements for treatment (x axis) and species (y axis) for each cefotaxime treatment.  
603 'C0', 'C4', 'C6' and 'C8' correspond to 0, 125, 500 and 2000  $\mu\text{g/L}$  cefotaxime respectively. The  
604 number after the concentration denotes the biological replicate number (1 – 5), chosen randomly  
605 for sequencing at day 8 of the experiment.

606

607 Figure S2. Linear Discriminant Analyses (LDA) effect size (LEfSe) analyses of statistically  
608 significant species associated with different cefotaxime treatments. Negative LDA scores (red)  
609 show species enriched in the no antibiotic treatment, and positive LDA scores (green) show  
610 species enriched in the 2000  $\mu\text{g/L}$  cefotaxime treatment.

611

612 Figure S3. Heatmap showing average (biological replicate n=3) resistance gene relative  
613 abundance (resistance gene number normalised with 16S rRNA copy number), following 8 days  
614 culture with cefotaxime. “Macrolide-Linco-Strept” = Macrolide, Lincosamide and Streptogramin  
615 resistance.

616

617 Figure S4. MSC (cefotaxime concentration at the x-axis intercept) determination using average  
618 (n=5) selection coefficients (natural log of  $bla_{CTX-M}$  prevalence over 8 days,  $bla_{CTX-M}$  prevalence  
619 =  $bla_{CTX-M}$  copy number/16S rRNA copy number, qPCR technical replicate n=2). Shown with  
620 standard error bars (of biological replicates) and polynomial (order 2) line of best fit.

621

622 Figure S5. Average (biological replicate n=5, technical qPCR replicate of each biological  
623 replicate n=2)  $bla_{CTX-M}$  prevalence ( $bla_{CTX-M}$  copy number/16S rRNA copy number) number at  
624 day 0 and following 1, 4 and 8 days of cefotaxime exposure. Shown with standard error bars (of  
625 biological replicates).

626

627 Figure S6. Average (biological replicate n=5, technical qPCR replicate of each biological  
628 replicate n=2)  $bla_{CTX-M}$  copy number following 8 days cefotaxime exposure in the higher  
629 concentration experiment. Shown with standard error bars (of biological replicates).

630

631 Figure S7. Average (biological replicate n=5, technical qPCR replicate of each biological  
632 replicate n=2) 16S rRNA copy number following 8 days cefotaxime exposure, in the higher  
633 concentration experiment. Shown with standard error bars (of biological replicates).

634

635 Figure S8. Growth (optical density (600nm)) of the complex community over time during the 24  
636 hour degradation experiment. Single replicate only.

637

638 Table S1. Nominal (expected) and average (biological replicate n=3, technical replicate of each  
639 n=2) measured cefotaxime concentrations as determined by LC-MS at the beginning (time 0) of  
640 the selection experiment, and after 24 hours culture at 180rpm, 37°C in the presence of the  
641 complex community. Also shown are the cefotaxime stocks ('1' and '2') used in the experiment.

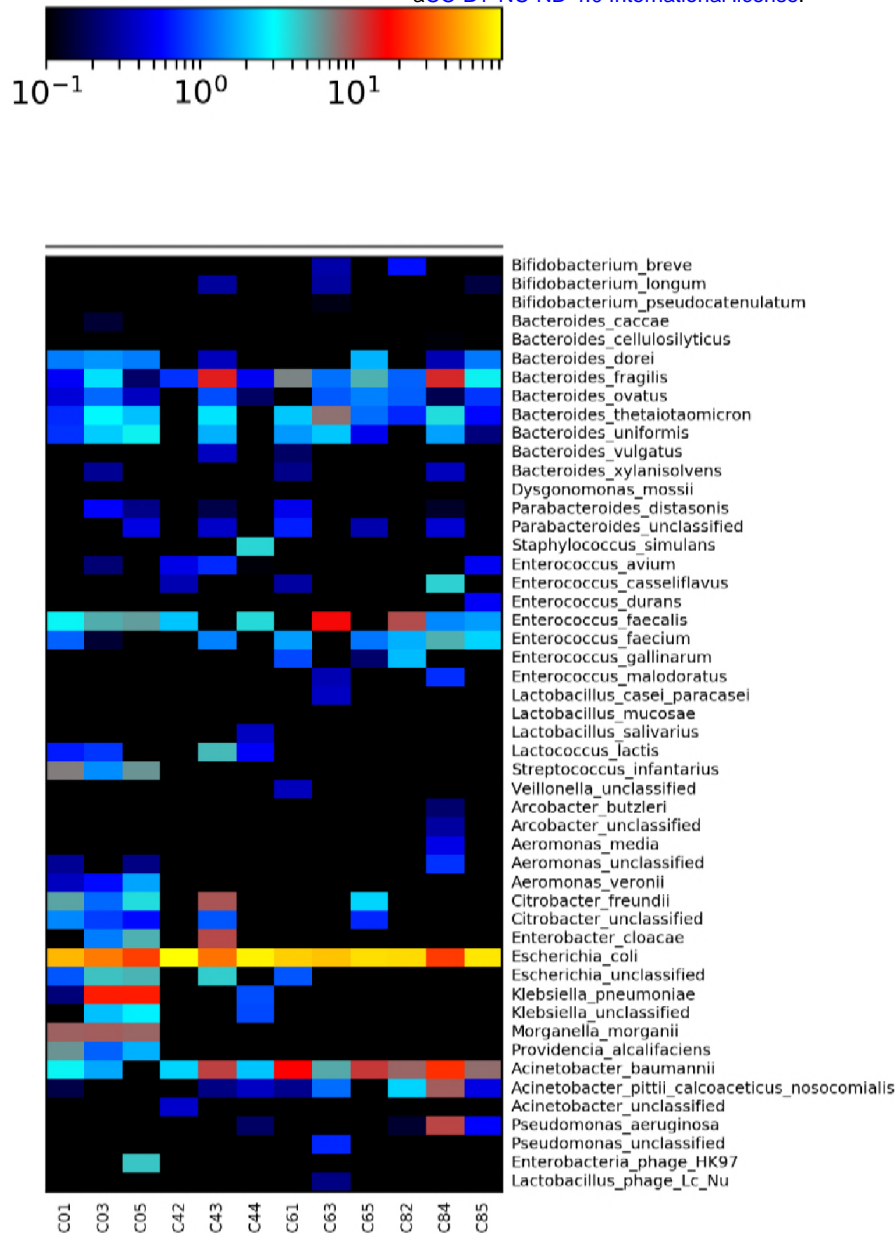

Figure 1. Heatmap showing the relative abundance of detected species using Bray Curtis distance measurements for treatment (x axis) and species (y axis) for each cefotaxime treatment. ‘C0’, ‘C4’, ‘C6’ and ‘C8’ correspond to 0, 125, 500 and 2000  $\mu\text{g/L}$  cefotaxime respectively. The number after the concentration denotes the biological replicate number (1 – 5), chosen randomly for sequencing at day 8 of the experiment.



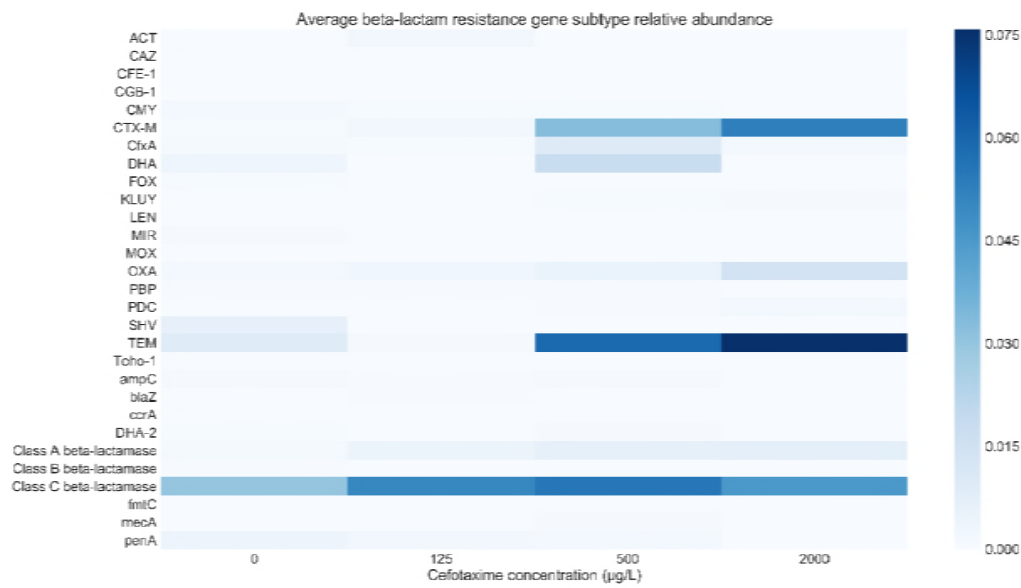

Figure 2. Heatmap showing average ( $n=3$ ) detected beta-lactam resistance gene subtype relative abundance (resistance gene number normalised with 16S rRNA copy number), following 8 days culture with cefotaxime. Only genes detected with the ARGs-OAP pipeline are shown.

Selection coefficients based on *bla*<sub>CTX-M</sub> prevalence

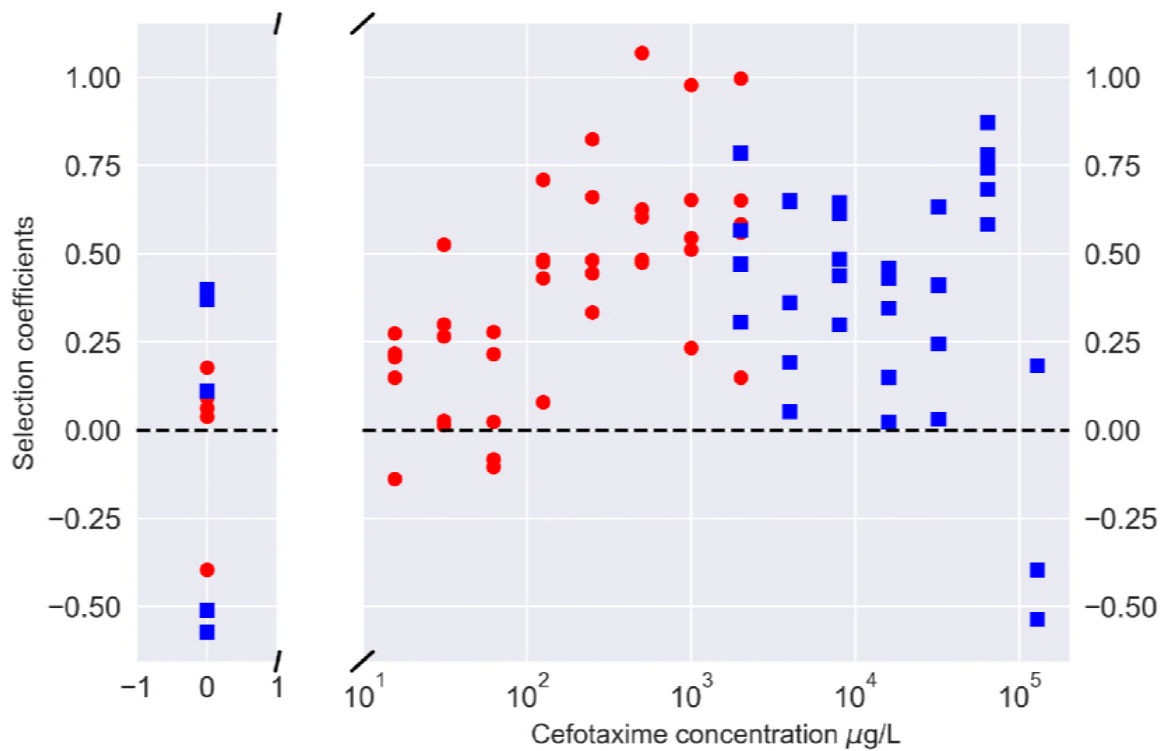

Figure 3. Selection coefficients (n=5) for each cefotaxime concentration, which equal the natural log of resistance gene prevalence (*bla*<sub>CTX-M</sub> gene/16S rRNA copy number) at day 0 and day 8. ● = selection coefficients from low concentration experiment and ■ = from high concentration experiment. Selection coefficients > 0 indicate positive selection.

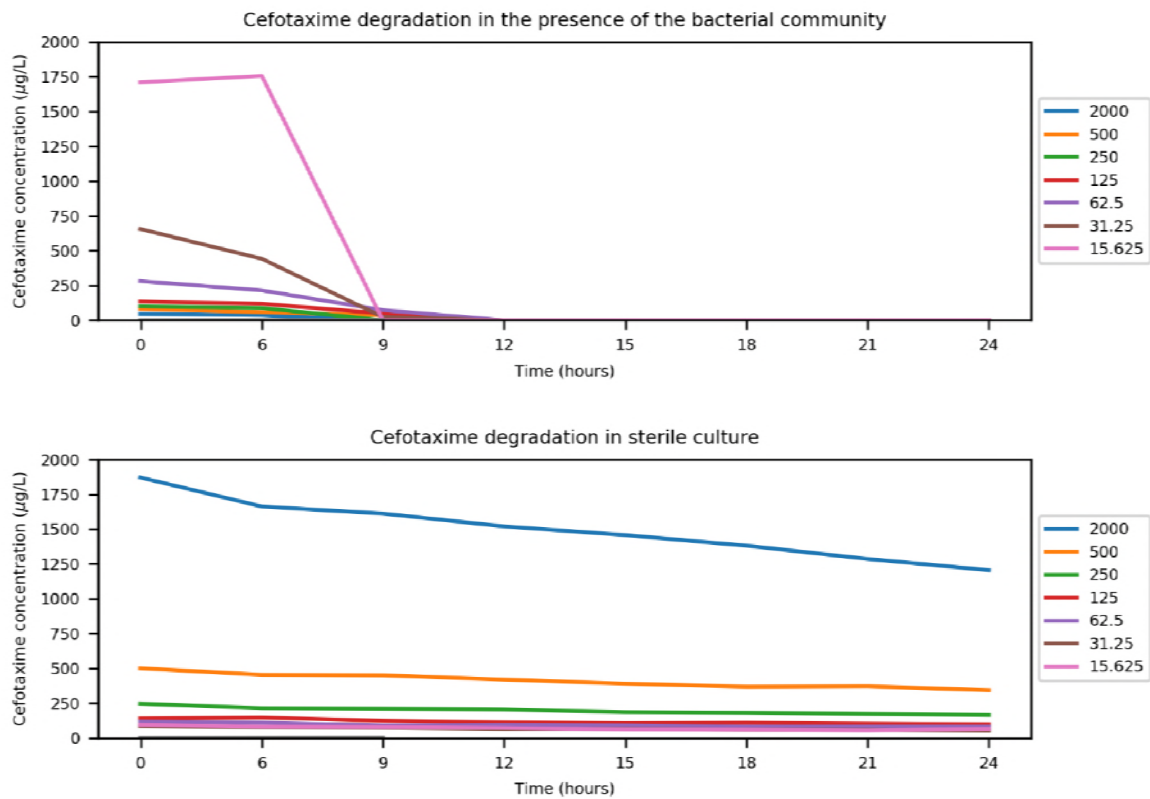

Figure 4. Single biological replicate, duplicate chemical replicate chemical quantification of cefotaxime ('Measured cefotaxime concentration ug/L) at 0 and 6 hours, then every 3 hours for 24 hours at different starting cefotaxime concentrations (ug/L) in the presence of the complex bacterial community (A) and in sterile culture (B).

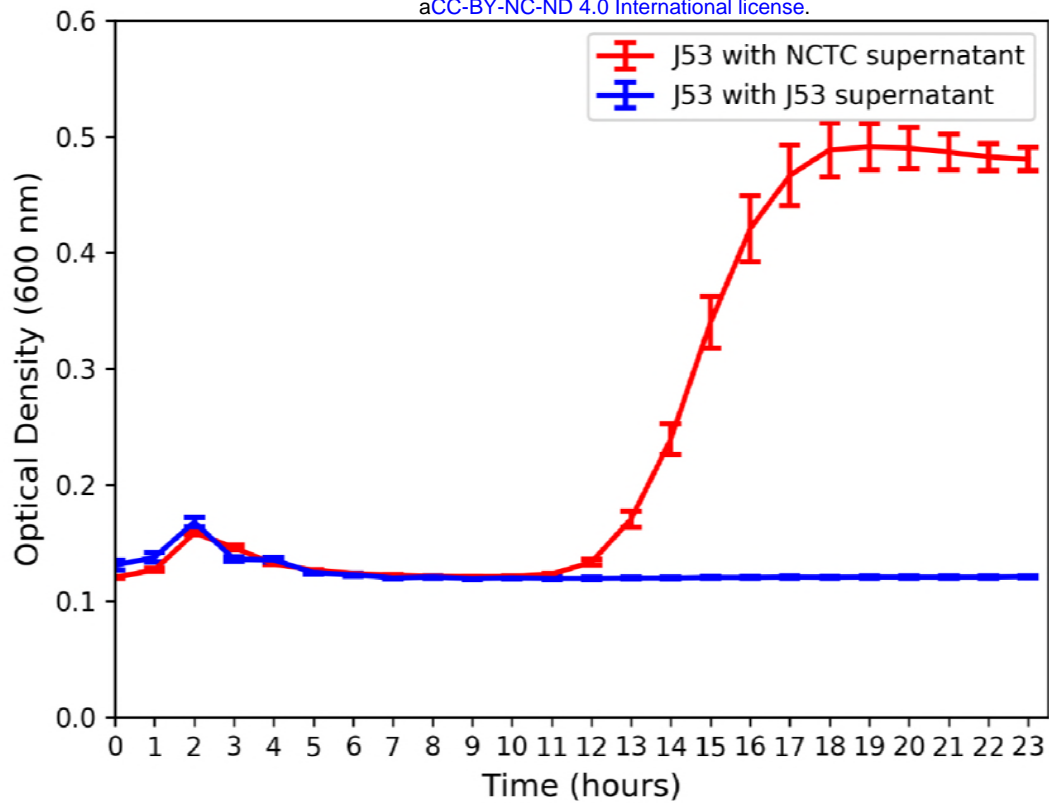

Figure 5. Average (n=4) optical density (600nm) over time of susceptible *E. coli* strain J53 grown in 2000  $\mu\text{g/L}$  cefotaxime (clinical breakpoint concentration for *Enterobacteriaceae*) with beta-lactamase containing supernatant (NCTC strain 13451) or beta-lactamase free supernatant (strain J53).
